# Supplementary material
Source: PubMed Central journal article supplement (PMC1629060)
Supplement: rsbl20040262s05.pdf [file rsbl20040262s05.pdf]

# **ELECTRONIC APPENDIX**

This is the Electronic Appendix to the article

The relative role of winter and spring conditions: linking climate and landscape-scale  
plant phenology to alpine reindeer body mass  
by

Nathalie Pettorelli, Robert B. Weladji, Øystein Holand, Atle Mysterud, Halgrim Breie,  
Nils Chr. Stenseth

*Biol. Lett.* (doi:10.1098/rsbl.2004.0262)

Electronic appendices are refereed with the text; however, no attempt is made  
to impose a uniform editorial style on the electronic appendices.

## Supplementary on-line information

Supplementary Table 1: Correlation coefficients between local winter and spring weather parameters and North Atlantic Oscillation indexes (Winter and April) in our three districts (winter: average temperature from December to march, sum of the snow depth and precipitations from December to March; spring: precipitations and temperature in April). 1996 being identified as an outlier, results are presented without the consideration of this peculiar year. No significant correlations are reported here (number of years considered: 10 (1992-2002)).

|                          | Elgå   | Essand | Riast |
|--------------------------|--------|--------|-------|
| NAO April/Temperature    | 0.09   | 0.47   | 0.33  |
| NAO April/Precipitations | -0.009 | -0.57  | -0.06 |
| NAOw/Temperatures        | 0.22   | 0.37   | 0.28  |
| NAOw/Precipitations      | 0.02   | 0.20   | 0.32  |
| NAOw/ln (Snow depth+4)   | 0.009  | 0.30   | 0.47  |

Supplementary Table 2: Parameter estimates from the linear model considering global climate indices for NDVI - 1<sup>st</sup> of May from 1982 to 2001. 1996 being identified as an outlier (the only low winter-NAO value in the time series considered), results are presented without the consideration of this peculiar year.

| <i>Parameters</i>      | <i>Estimates</i> | <i>SE</i> | <i>T value</i> | <i>P value</i> |
|------------------------|------------------|-----------|----------------|----------------|
| Intercept              | 6.97             | 1.27      | 5.48           | <0.001         |
| Year                   | 0.0005           | 0.0004    | 1.16           | 0.24           |
| Latitude               | -0.12            | 0.01      | -8.45          | <0.001         |
| Coast                  | -0.003           | 0.0008    | -3.86          | 0.001          |
| Average altitude       | -0.02            | 0.002     | -11.91         | <0.001         |
| NAO in winter          | 0.01             | 0.001     | 11.14          | <0.001         |
| NAO in April           | 0.02             | 0.001     | 16.87          | <0.001         |
| NAO in winter*Altitude | -0.005           | 0.003     | -1.76          | 0.08           |
| NAO in winter*Coast    | 0.009            | 0.003     | 3.03           | 0.002          |
| NAO in April*Latitude  | -0.01            | 0.005     | -1.86          | 0.06           |
| NAO in April*Coast     | -0.004           | 0.005     | -0.71          | 0.48           |
| NAO in April*Altitude  | -0.01            | 0.002     | -3.85          | 0.0001         |

Supplementary Table 3: Parameter estimates from the linear model considering global climate index (NAO in winter) for reindeer body mass. 1996 being identified as an outlier (1996 is the only low winter-NAO value in the time series considered), results are presented without the consideration of this peculiar year.

| <i>Parameters</i> | <i>Estimates</i> | <i>SE</i> | <i>T value</i> | <i>P value</i> |
|-------------------|------------------|-----------|----------------|----------------|
| Intercept         | 2.96             | 0.02      | 160.71         | <0.001         |
| Females           | -0.07            | 0.02      | -4.54          | <0.001         |
| Riast             | 0.12             | 0.02      | 5.99           | <0.001         |
| Elgå              | 0.11             | 0.02      | 4.80           | <0.001         |
| NAOw              | -0.009           | 0.005     | -1.89          | 0.06           |
| NDVI              | 0.39             | 0.11      | 3.58           | <0.001         |
